# Supplementary material for: Genetic characteristics and pathogenesis of H5 low pathogenic avian influenza viruses from wild birds and domestic ducks in South Korea
Source: PubMed Central journal article supplement (PMC7376034; doi:10.1038/s41598-020-68720-w), 2020-07-22

## **Supplementary information**

### **Genetic characteristics and pathogenesis of H5 low pathogenic avian influenza viruses from wild birds and domestic ducks in South Korea**

Yu-Na Lee<sup>1</sup>, Dong-Hun Lee<sup>2</sup>, Sun-Ha Cheon<sup>1</sup>, Yu-Ri Park<sup>1</sup>, Yoon-Gi Baek<sup>1</sup>, Young-Jae Si<sup>1</sup>,  
Soo-Jeong Kye<sup>1</sup>, Eun-Kyoung Lee<sup>1</sup>, Gyeong-Beom Heo<sup>1</sup>, You-Chan Bae<sup>3</sup>, Myoung-Heon Lee<sup>1</sup>,  
and Youn-Jeong Lee<sup>1,\*</sup>

Supplementary Table 1. H5 low pathogenic avian influenza viruses isolated in South Korea between 2012 and 2017.

| Genotype | Virus name                             | Subtype | Collection date | Region | Samples   | GISAID Isolate ID |
|----------|----------------------------------------|---------|-----------------|--------|-----------|-------------------|
| HA-II    | A/common teal/Korea/A40-1/2012         | H5N3    | 2012-12-18      | JJ     | Feces     | EPI_ISL_243044    |
|          | A/wild bird feces/Korea/H598/2014      | H5N3    | 2014-02-18      | Seoul  | Feces     | EPI_ISL_243045    |
|          | A/spot-billed duck/Korea/H1862/2014    | H5N3    | 2014-11-14      | GG     | Swab      | EPI_ISL_369299    |
|          | A/wild bird feces/Korea/H2016/2014     | H5N3    | 2014-12-24      | GN     | Feces     | EPI_ISL_243047    |
|          | A/wild bird feces/Korea/H2193/2015     | H5N3    | 2015-01-07      | CN     | Feces     | EPI_ISL_369292    |
|          | A/wild bird feces/Korea/H2262/2015     | H5N9    | 2015-01-15      | Busan  | Feces     | EPI_ISL_369293    |
|          | A/wild bird feces/Korea/H2512/2015     | H5N3    | 2015-03-09      | JJ     | Feces     | EPI_ISL_369294    |
|          | A/wild bird feces/Korea/H3328/2015     | H5N3    | 2015-11-19      | GG     | Feces     | EPI_ISL_369308    |
|          | A/bean goose/Korea/H3373/2015          | H5N3    | 2015-12-07      | Seoul  | Feces     | EPI_ISL_369332    |
| HA-III   | A/wild bird feces/Korea/H2292/2015     | H5N3    | 2015-01-22      | GG     | Feces     | EPI_ISL_377143    |
|          | A/wild bird feces/Korea/H2318/2015     | H5N3    | 2015-01-21      | GG     | Feces     | EPI_ISL_369295    |
|          | A/spot-billed duck/Korea/H3135/2015    | H5N3    | 2015-11-02      | CN     | Feces     | EPI_ISL_369300    |
|          | A/white-fronted goose/Korea/H3173/2015 | H5N3    | 2015-10-29      | GW     | Feces     | EPI_ISL_369301    |
|          | A/wild bird feces/Korea/H3306/2015     | H5N3    | 2015-11-09      | GG     | Feces     | EPI_ISL_369296    |
|          | A/bean goose/Korea/H3316/2015          | H5N3    | 2015-11-16      | GG     | Feces     | EPI_ISL_369309    |
|          | A/white-fronted goose/Korea/H3334/2015 | H5N3    | 2015-11-23      | GG     | Feces     | EPI_ISL_369302    |
|          | A/broiler duck/Korea/H3422/2015        | H5N3    | 2015-12-17      | JN     | Carcasses | EPI_ISL_369297    |
|          | A/pink-footed goose/Korea/H3473/2015   | H5N3    | 2015-12-21      | CN     | Feces     | EPI_ISL_369303    |
|          | A/mandarin duck/Korea/A44-1-3/2016     | H5N3    | 2016-11-04      | JN     | Feces     | EPI_ISL_369310    |
|          | A/mallard/Korea/H50-4/2016             | H5N3    | 2016-11-22      | CN     | Feces     | EPI_ISL_369304    |
|          | A/mallard/Korea/H95-4/2016             | H5N3    | 2016-11-29      | JB     | Feces     | EPI_ISL_369305    |
|          | A/white-fronted goose/Korea/H96-1/2016 | H5N3    | 2016-11-29      | GG     | Feces     | EPI_ISL_369306    |
|          | A/mallard/Korea/H125-4/2016            | H5N3    | 2016-12-01      | JB     | Feces     | EPI_ISL_369307    |
|          | A/wild bird feces/Korea/H189-1/2016    | H5N3    | 2016-12-01      | GN     | Feces     | EPI_ISL_369298    |
|          | A/spot-billed duck/Korea/H422-7/2016   | H5N3    | 2016-12-14      | GB     | Feces     | EPI_ISL_369311    |
|          | A/spot-billed duck/Korea/H604-1/2016   | H5N3    | 2016-12-27      | GN     | Feces     | EPI_ISL_369312    |
|          | A/white-fronted goose/Korea/H886/2017  | H5N3    | 2017-01-16      | JB     | Feces     | EPI_ISL_369313    |
|          | A/mallard/Korea/H1029-2/2017           | H5N3    | 2017-03-13      | GG     | Feces     | EPI_ISL_369314    |

|       |                                        |      |            |       |       |                |
|-------|----------------------------------------|------|------------|-------|-------|----------------|
|       | A/wild bird/Korea/H1069-3/2017         | H5N3 | 2017-03-20 | JJ    | Feces | EPI_ISL_369315 |
|       | A/spot-billed duck/Korea/A09-1-2/2017  | H5N3 | 2017-10-10 | GG    | Feces | EPI_ISL_369333 |
|       | A/mallard/Korea/A11-4/2017             | H5N3 | 2017-10-10 | Seoul | Feces | EPI_ISL_369316 |
|       | A/mallard/Korea/A14-2/2017             | H5N3 | 2017-10-10 | Seoul | Feces | EPI_ISL_369317 |
|       | A/mallard/Korea/A33-5/2017             | H5N2 | 2017-11-06 | JJ    | Feces | EPI_ISL_369318 |
|       | A/mallard/Korea/A44-5/2017             | H5N3 | 2017-11-15 | JB    | Feces | EPI_ISL_369319 |
|       | A/spot-billed duck/Korea/H10-1/2017    | H5N3 | 2017-11-20 | GG    | Feces | EPI_ISL_369334 |
|       | A/mallard/Korea/H15-1/2017             | H5N2 | 2017-11-22 | JB    | Feces | EPI_ISL_369320 |
|       | A/wild bird/Korea/H55/2017             | H5N2 | 2017-12-13 | GG    | Feces | EPI_ISL_369321 |
|       | A/wild bird/Korea/H57-2/2017           | H5N3 | 2017-12-18 | JB    | Feces | EPI_ISL_369322 |
| HA-IV | A/green-winged teal/Korea/H1105-3/2017 | H5N3 | 2017-04-20 | CN    | Feces | EPI_ISL_369323 |
|       | A/mallard/Korea/A21-2/2017             | H5N2 | 2017-10-26 | CB    | Feces | EPI_ISL_369324 |
|       | A/mallard/Korea/A32-3/2017             | H5N2 | 2017-11-06 | GG    | Feces | EPI_ISL_369325 |
|       | A/mallard/Korea/A42-4/2017             | H5N2 | 2017-11-13 | CN    | Feces | EPI_ISL_369326 |
|       | A/spot-billed duck/Korea/A45-1/2017    | H5N2 | 2017-11-15 | CN    | Feces | EPI_ISL_369327 |
|       | A/mallard/Korea/A46-1-4/2017           | H5N2 | 2017-11-15 | GG    | Feces | EPI_ISL_369328 |
|       | A/wild bird feces/Korea/H33/2017       | H5N2 | 2017-12-06 | JN    | Feces | EPI_ISL_369329 |
|       | A/wild bird feces/Korea/H49/2017       | H5N2 | 2017-12-06 | CN    | Feces | EPI_ISL_369335 |
|       | A/spot-billed duck/Korea/H51/2017      | H5N2 | 2017-12-11 | CN    | Feces | EPI_ISL_369330 |
|       | A/bean goose/Korea/H112/2017           | H5N2 | 2017-12-27 | JN    | Feces | EPI_ISL_369331 |

GISAID, Global Initiative on Sharing All Influenza Data; GG, Gyeonggi-do; GN, Gyeongsangnam-do; CN, Chungcheongnam-do; JJ, Jeju-do; GW, Gangwon-do; JN, Jeollanam-do; JB, Jeollabuk-do; GB, Gyeongsangbuk-do; CB, Chungcheongbuk-do.

**Supplementary Figure 1. Phylogenetic analysis of individual genes of H5 LPAIVs.**

Maximum-likelihood phylogenetic trees of (A) N2, (B) N3, (C) PB2, (D) PB1, (E) PA, (F) NP, (G) MP, and (H) NS genes of 48 H5 LPAIVs isolated in South Korea between 2010 and 2017 (red lines), along with all completed sequences (black lines) of N2 ( $n = 4,778$ ), N3 ( $n = 1,576$ ), PB2 ( $n = 10,500$ ), PB1 ( $n = 10,627$ ), PA ( $n = 9,492$ ), NP ( $n = 9,959$ ), MP ( $n = 9,963$ ), and NS ( $n = 9,426$ ) genes of avian influenza viruses that were available in GISAID and the NCBI Influenza Virus Database. Evolutionary analyses were conducted in RAxML.

LPAIV, low pathogenic avian influenza virus.

# a N2

- Eurasian lineage
- North American lineage
- Korean H5 LPAIV isolates

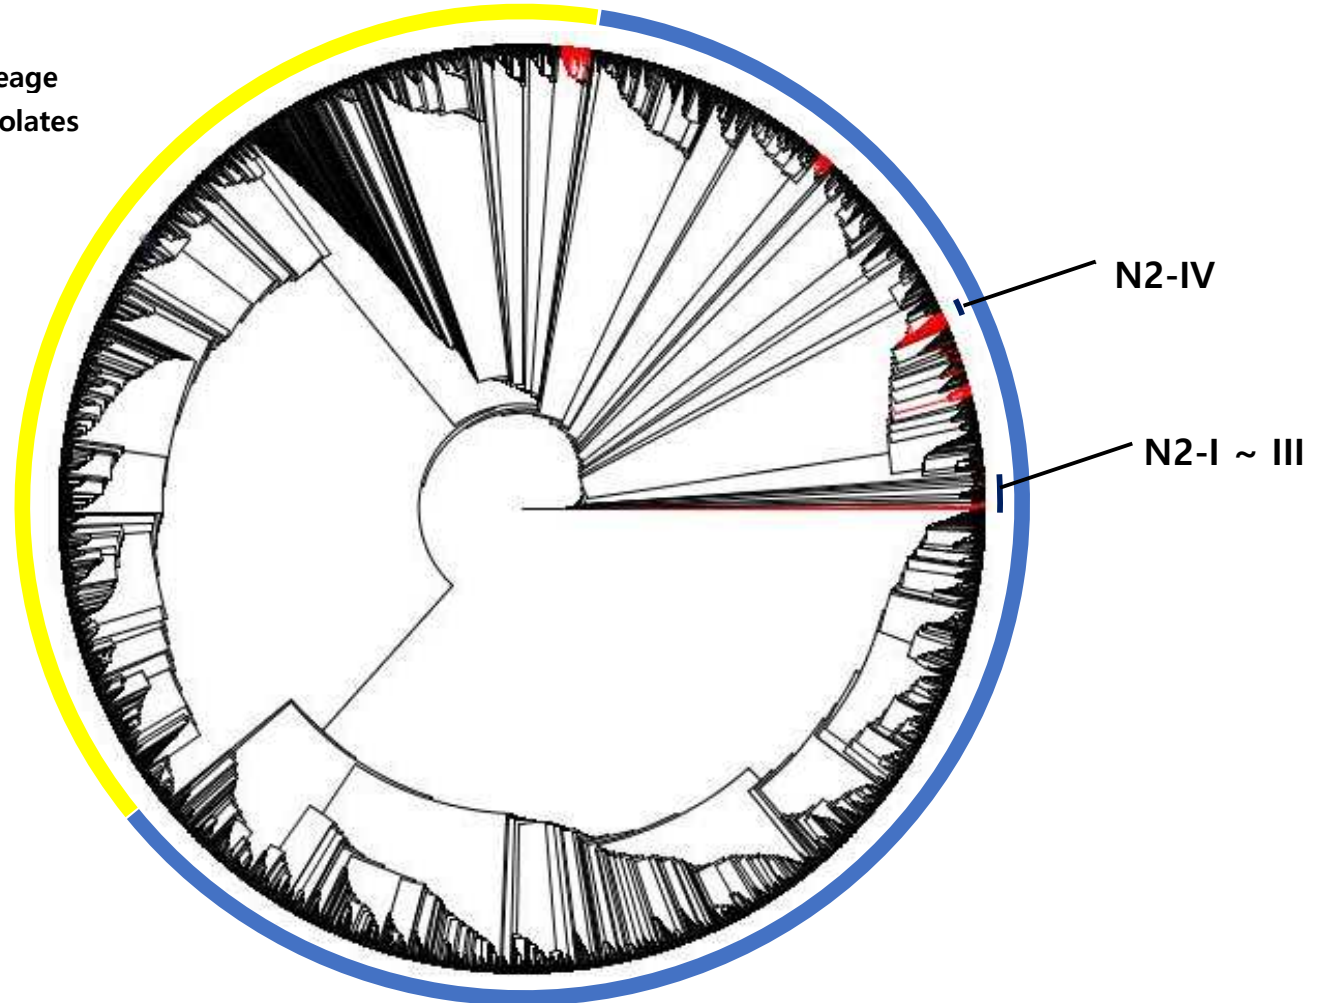

## b N3

-  Eurasian lineage
-  North American lineage
-  Korean H5 LPAIV isolates

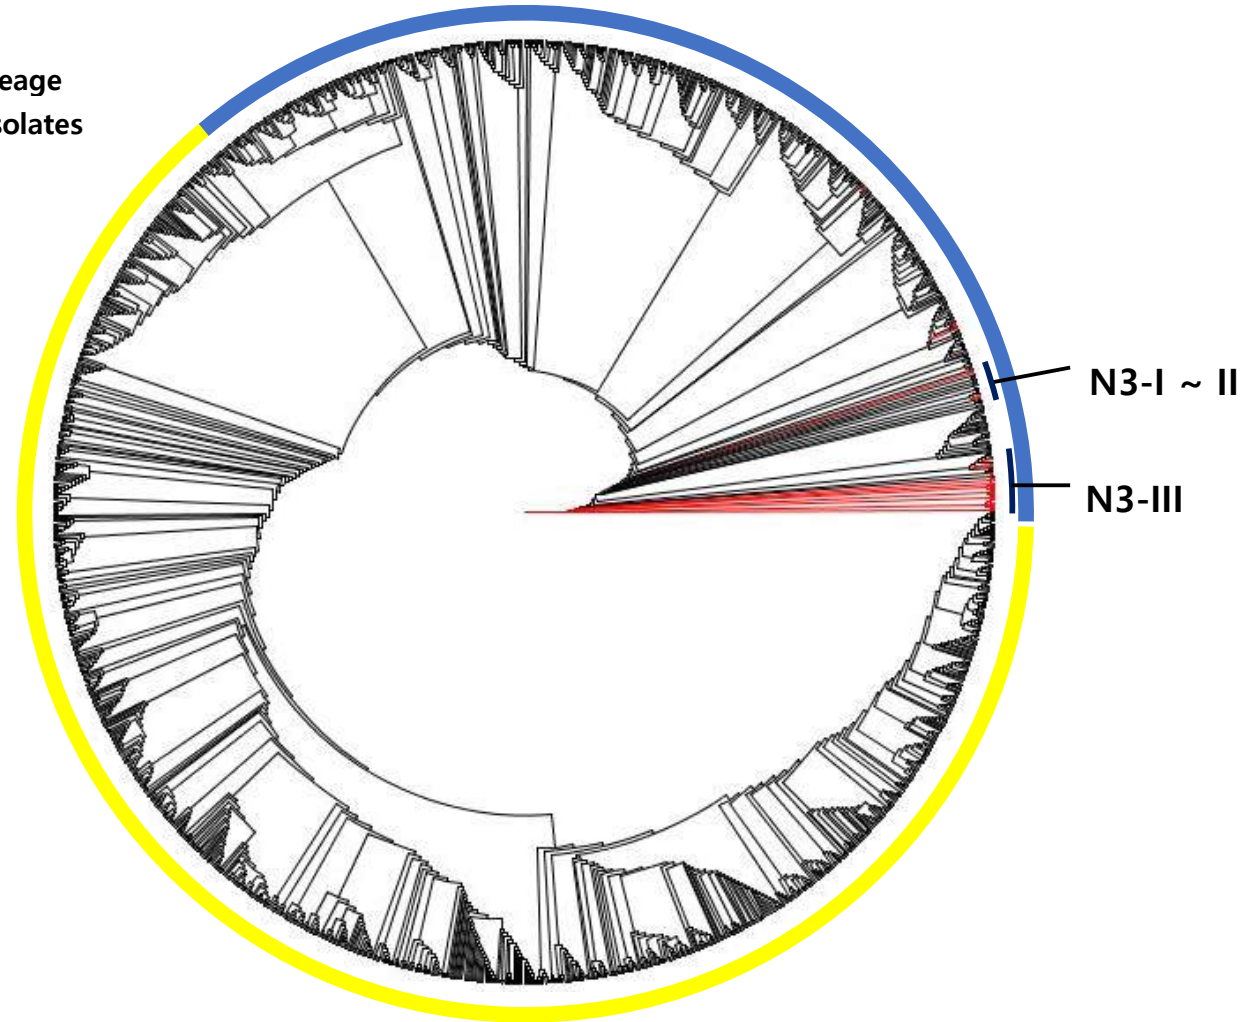

c PB2

- Eurasian lineage
- North American lineage
- Korean H5 LPAIV isolates

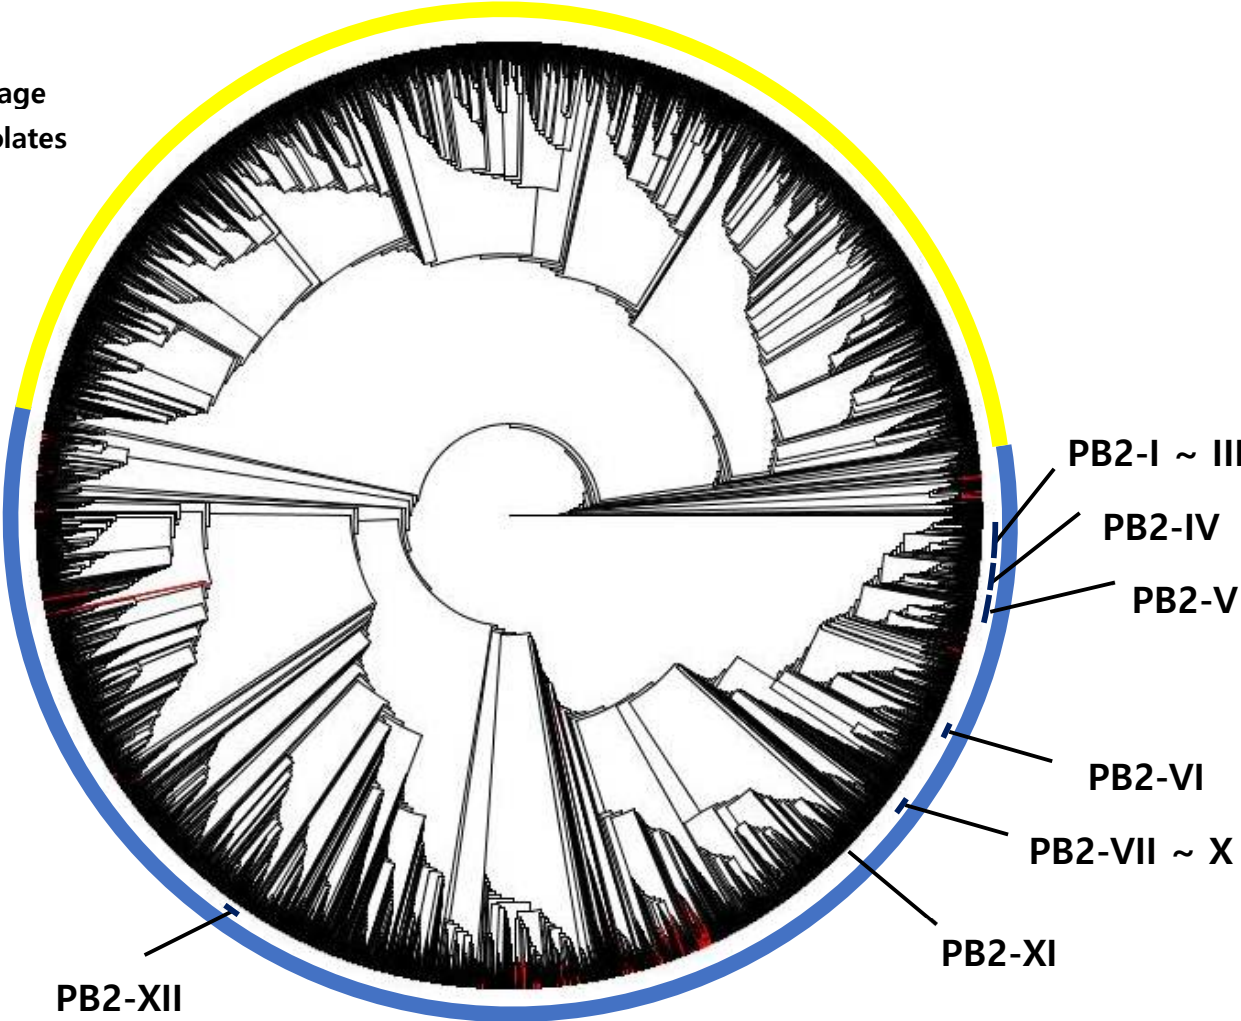

# d PB1

- Eurasian lineage
- North American lineage
- Korean H5 LPAIV isolates

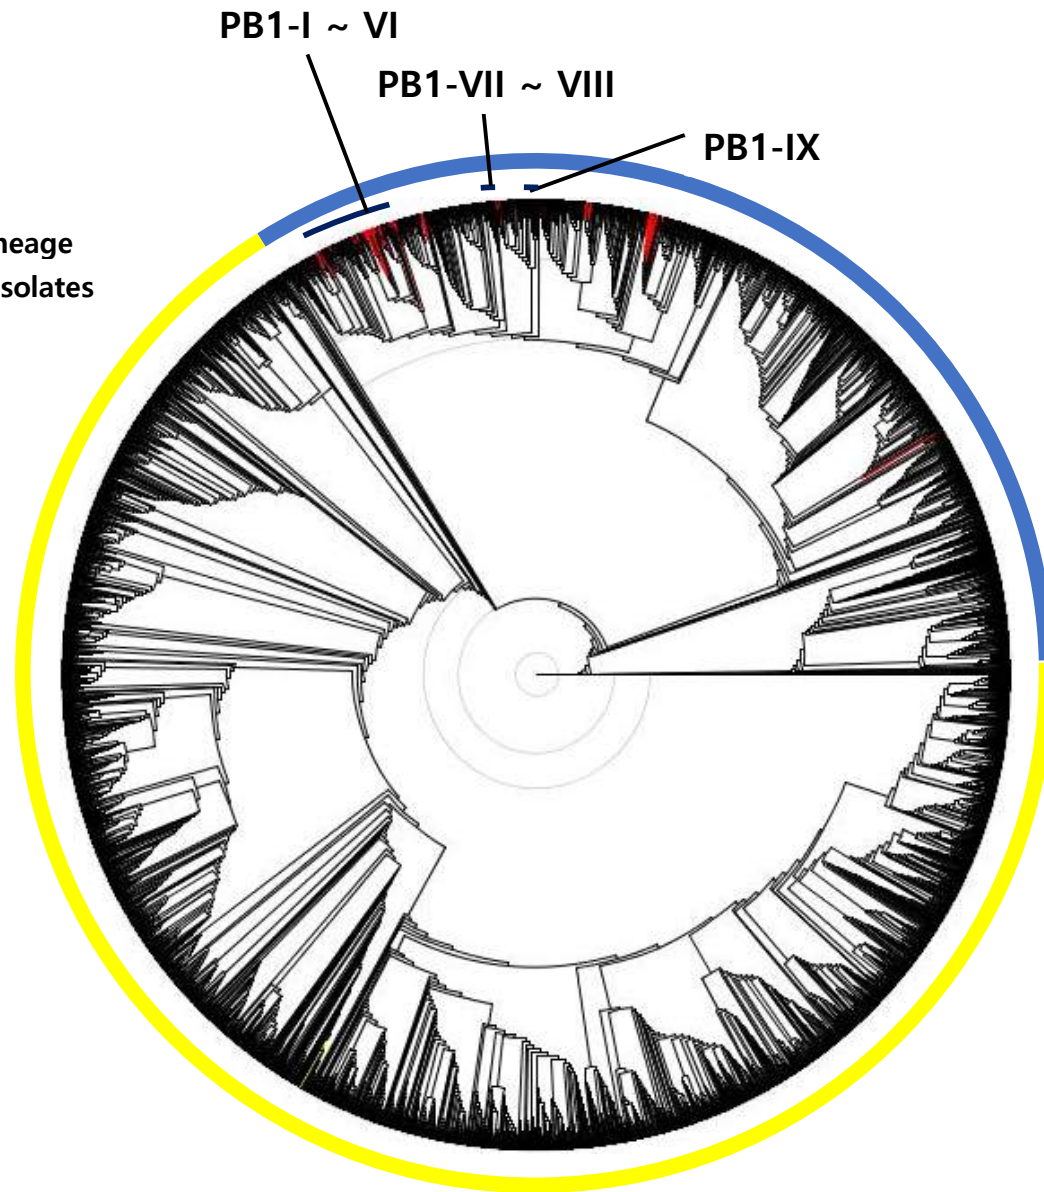



e PA

- Eurasian lineage
- North American lineage
- Korean H5 LPAIV isolates

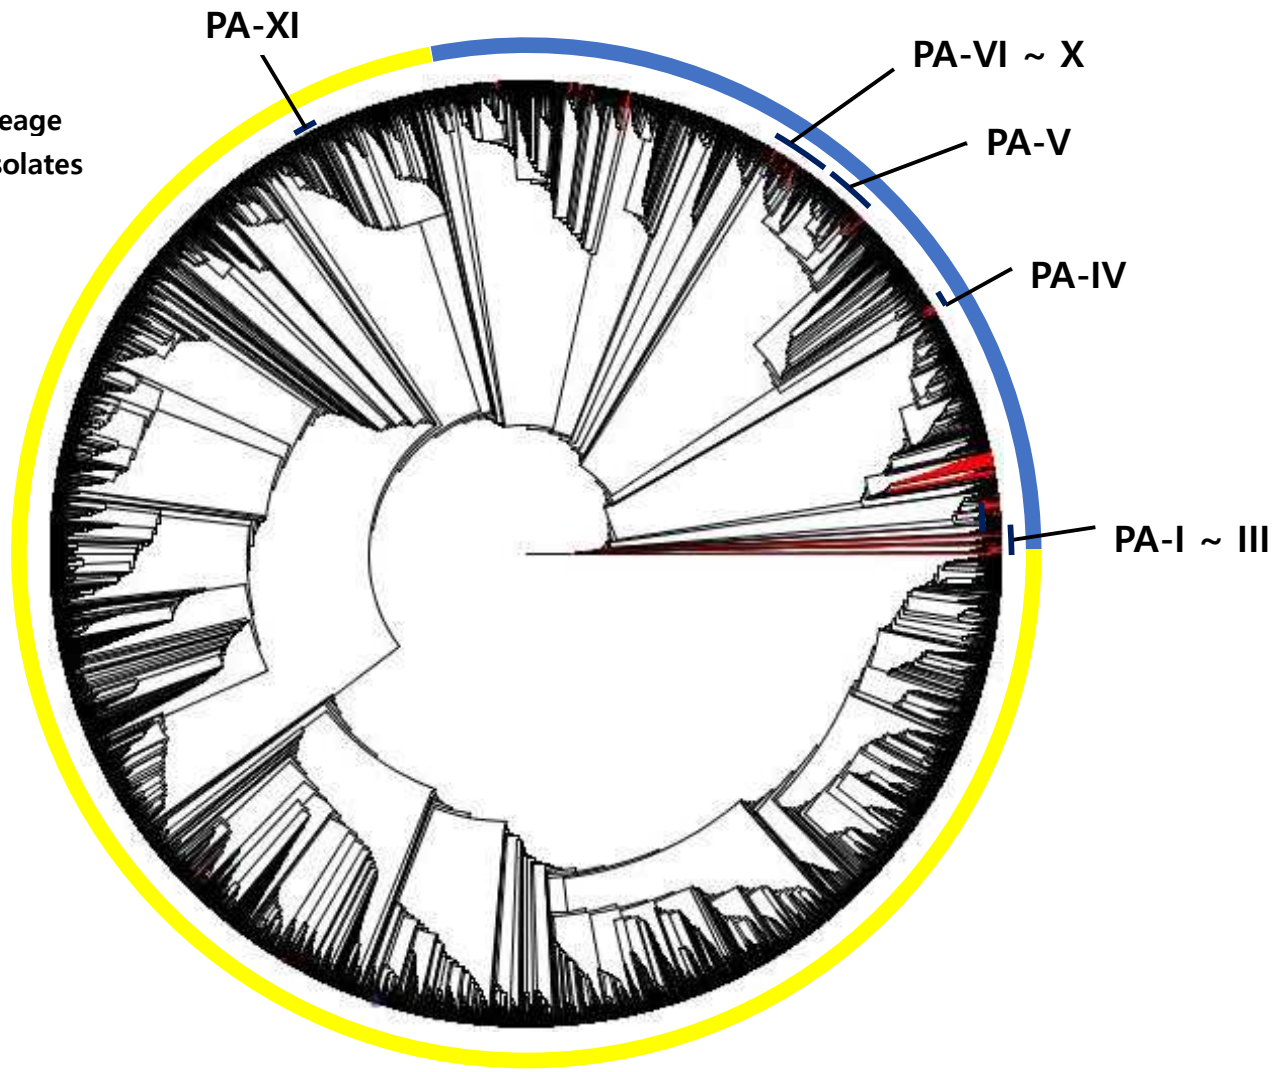

# f NP

- Eurasian lineage
- North American lineage
- Korean H5 LPAIV isolates

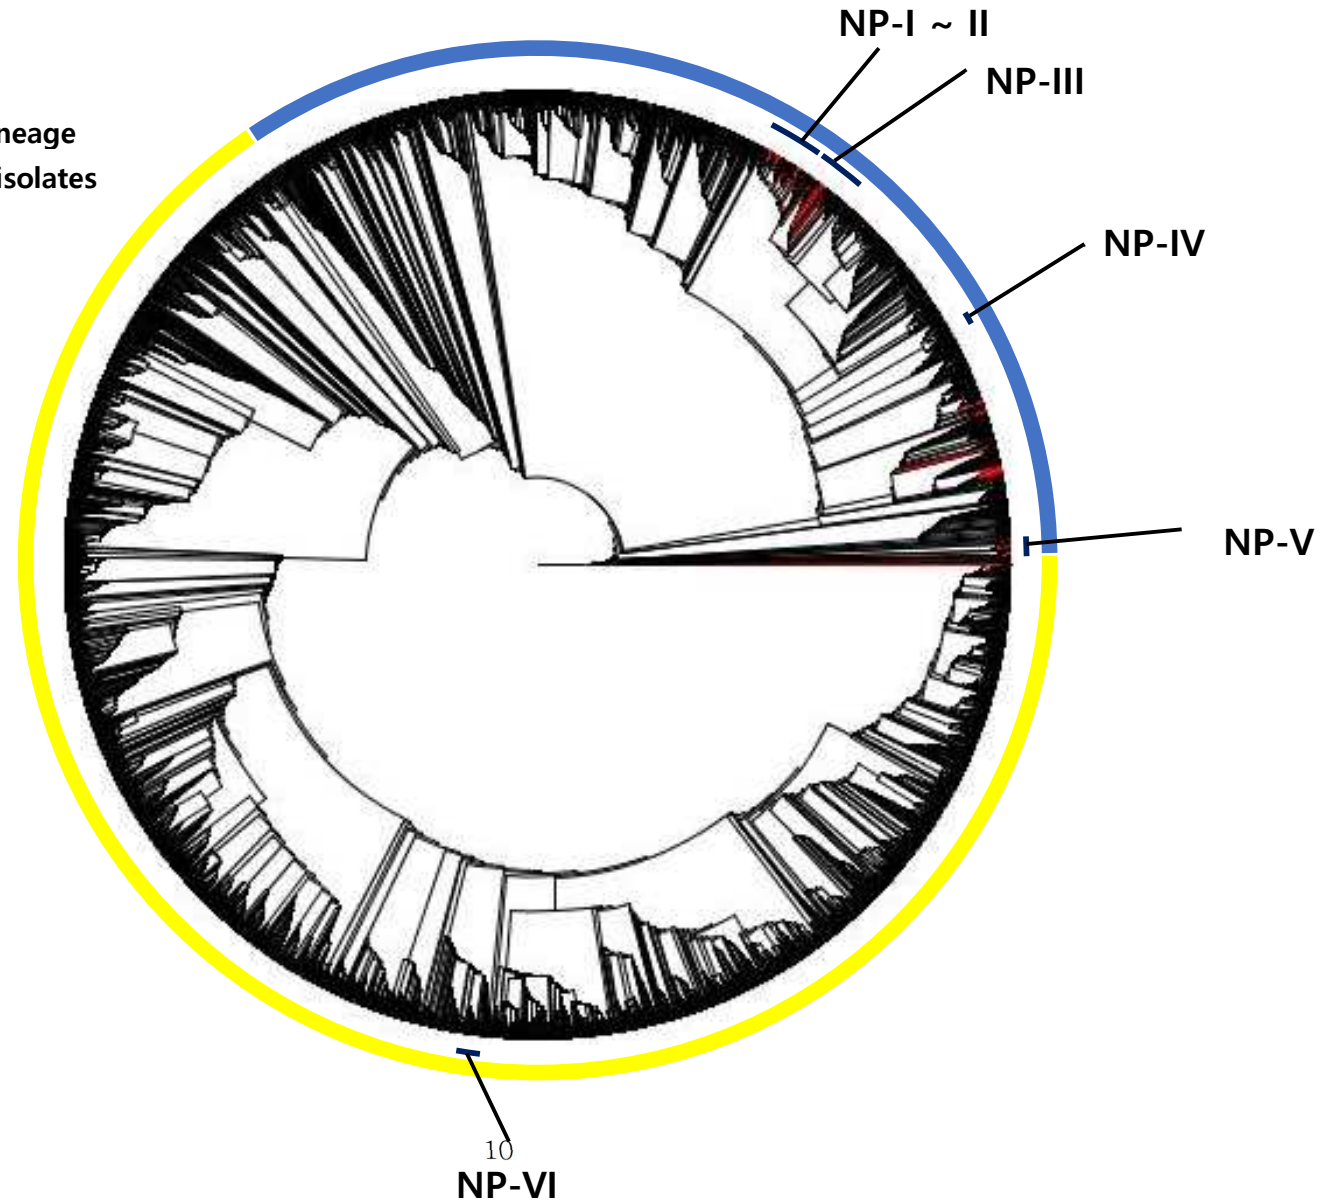

# g MP

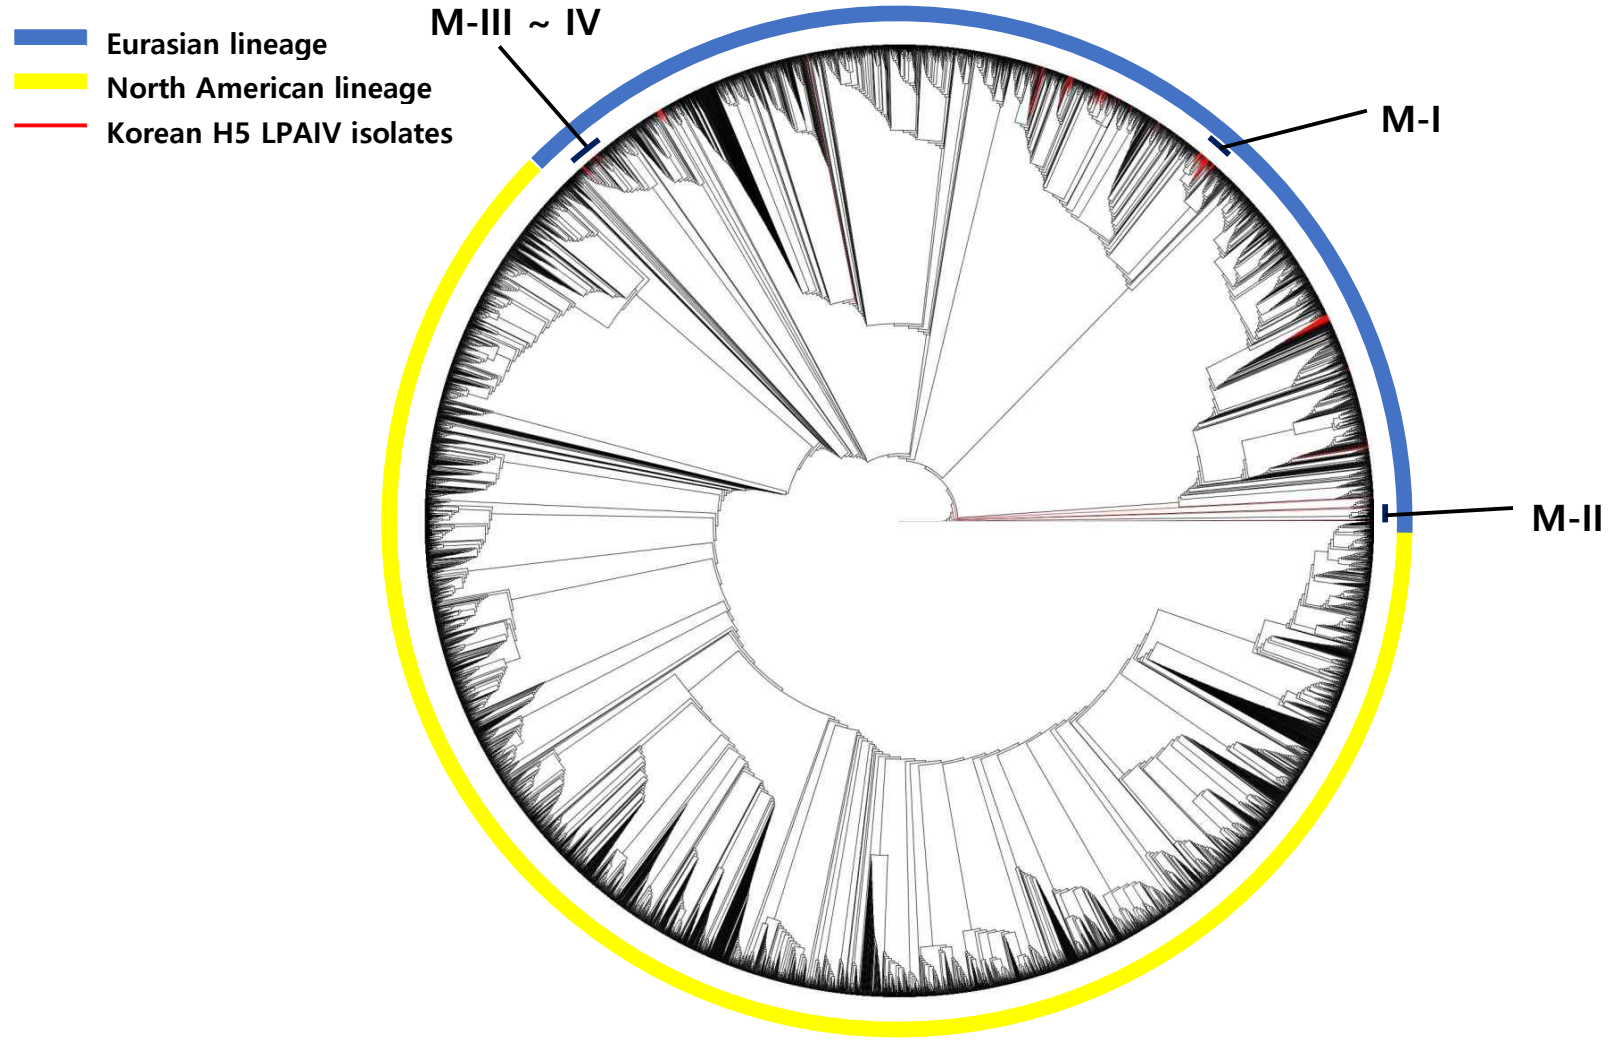

# h NS

- Eurasian lineage
- North American lineage
- Allele A
- Allele B
- Korean H5 LPAIV isolates

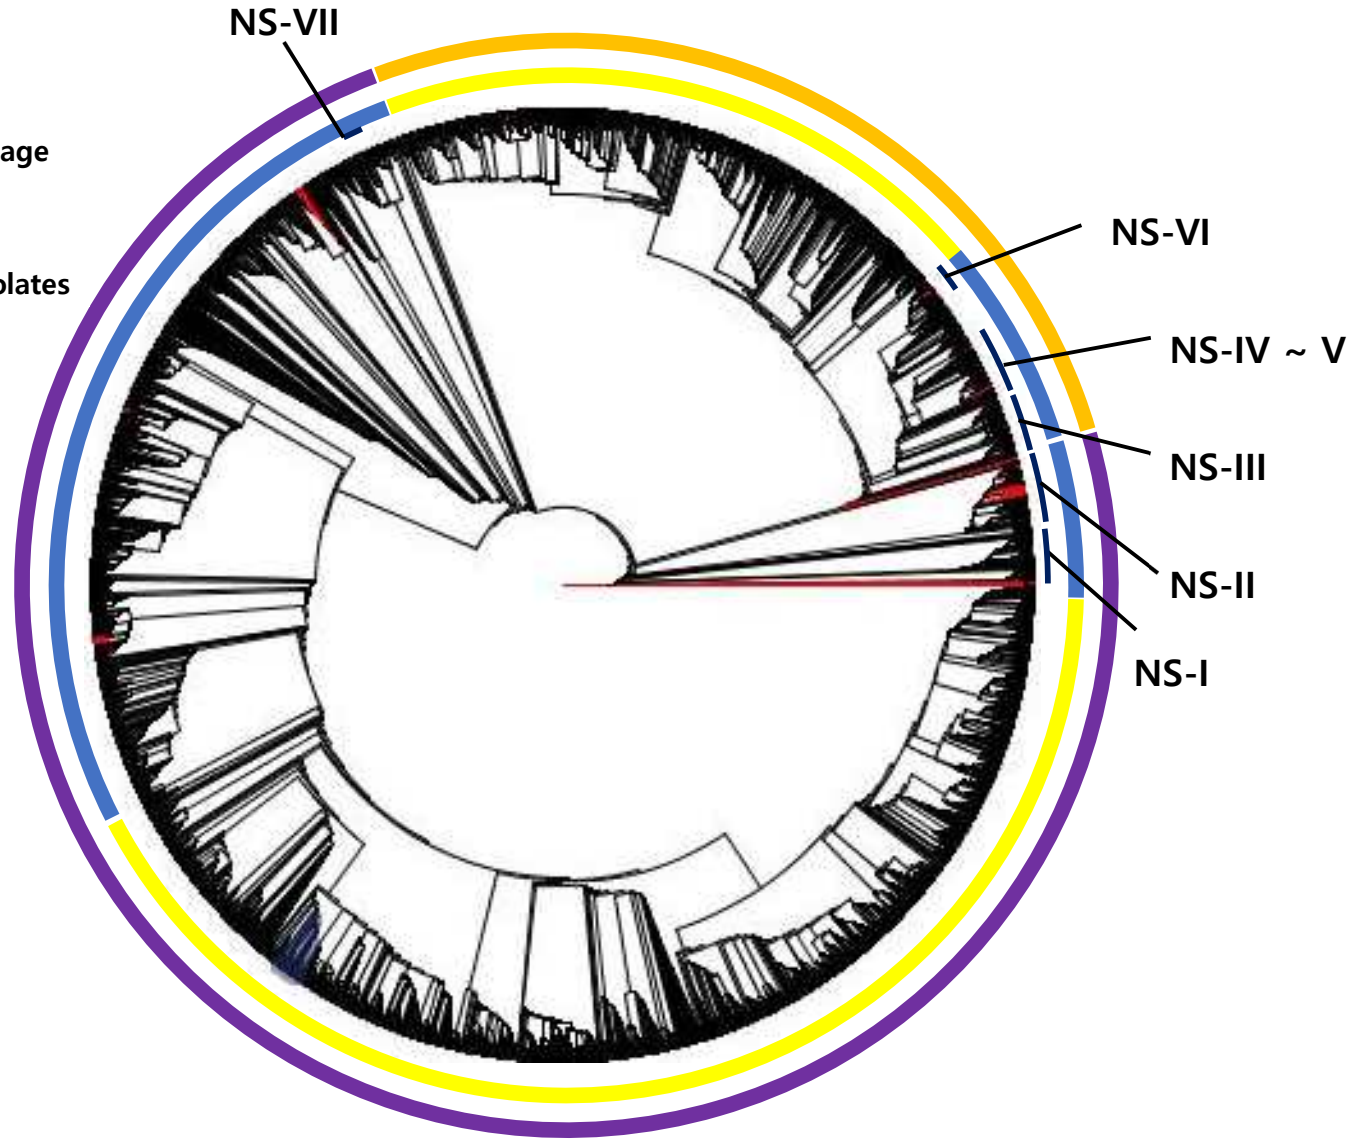

Supplement: 41598_2020_68720_MOESM1_ESM.pdf [file 41598_2020_68720_MOESM1_ESM.pdf]
